# Supplementary material
Source: PubMed Central journal article supplement (PMC7927855)
Supplement: AAC.01103-20-s0001.pdf [file AAC.01103-20-s0001.pdf]

1 SUPPLEMENTARY DATA

Supplementary Figure 1

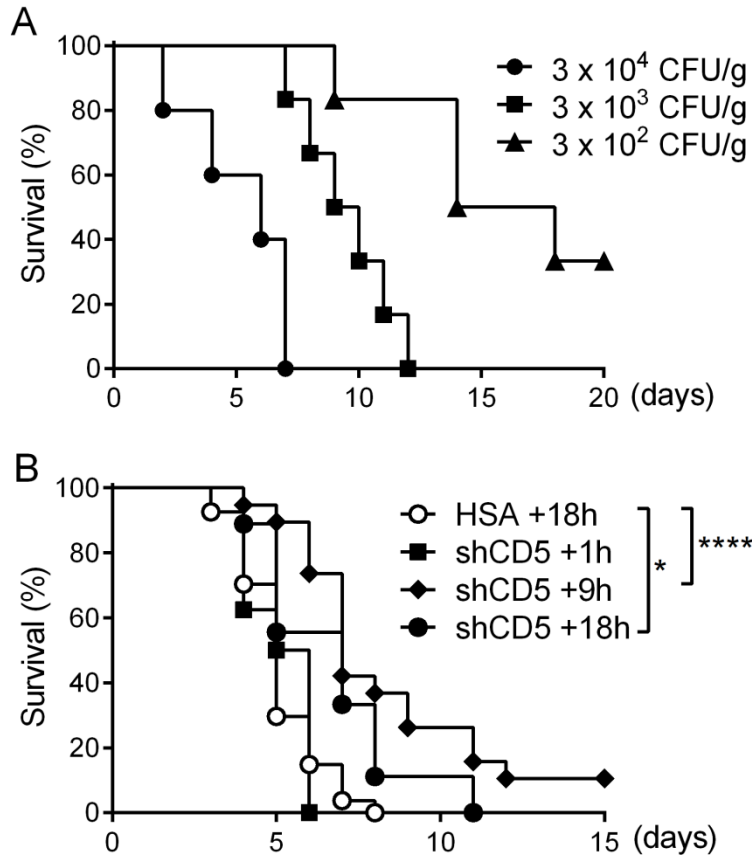

2

3 **Supplementary Figure 1. Lethality of different *C. albicans* inocula in CD1 mice. (A)**

4 Survival percentage over time of CD1 mice infected (*i.v.*) with different *C. albicans* inocula

5 ( $3 \times 10^2$  CFU/g,  $n = 6$ ;  $3 \times 10^3$  CFU/g,  $n = 6$ ;  $3 \times 10^4$  CFU/g,  $n = 5$ ). **(B)** Survival

6 percentage over time of CD1 mice infected with *C. albicans* ( $3 \times 10^4$  CFU/g, *i.v.*) and

7 treated with single HSA ( $n = 27$ ) or shCD5 doses (1.25 mg/kg, *i.v.*) at different time points

8 (hours) post-infection (+1h,  $n = 8$ ; +9h,  $n = 19$ ; +18h  $n = 9$ ). Statistical differences between

9 groups were analyzed by Log-rank (Mantel-Cox) test. \*,  $P \leq 0.05$ ; \*\*\*\*,  $P \leq 0.0001$ .

## Supplementary Figure 2

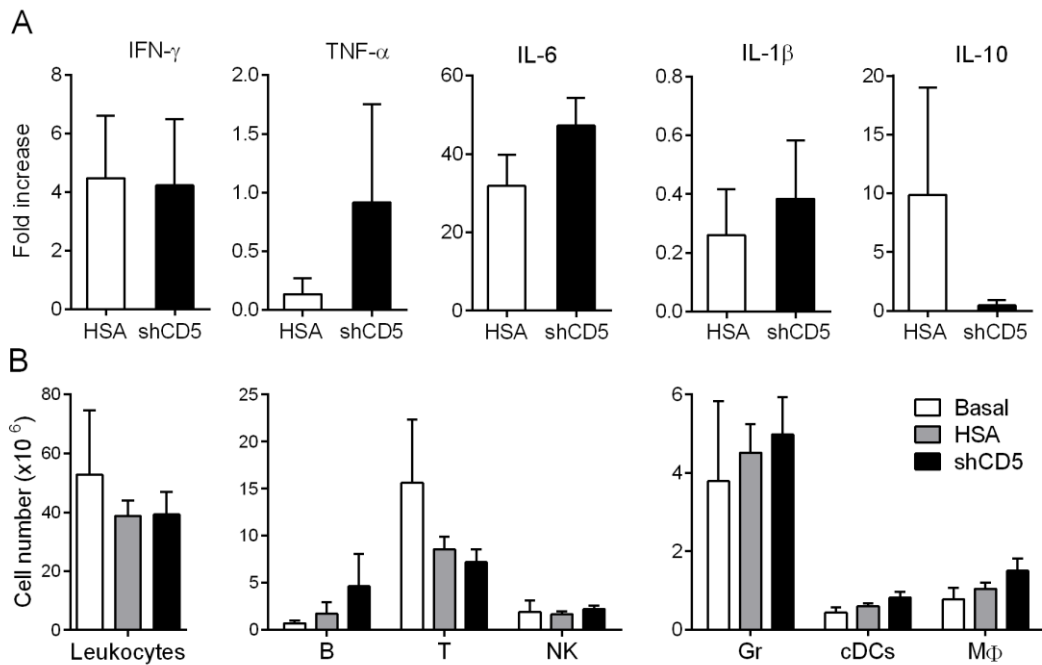

10

11 **Supplementary Figure 2. Effect of shCD5 infusion on serum cytokine levels and spleen**

12 **leukocyte infiltration from *C. albicans*-infected CD1 mice. (A)** Serum cytokine levels at

13 72 h post-infection of CD1 mice with *C. albicans* ( $3 \times 10^3$  CFU/g, *i.v.*) and treated (*i.v.*)

14 with single 1.25 mg/kg dose of HSA (n = 7) or shCD5 (n = 7) at 18 h post-infection.

15 Represented are fold inductions with regard to non-infected mice (basal, n = 4). (B)

16 leukocyte (CD45<sup>+</sup>), B (B220<sup>+</sup>CD3<sup>-</sup>), T (CD3<sup>+</sup>B220<sup>-</sup>), natural killer (NK, NK1.1<sup>+</sup>CD3<sup>-</sup>)

17 granulocytes (Gr, Gr-1<sup>+</sup>SSC<sup>hi</sup>), conventional dendritic cells (cDCs, CD11c<sup>+</sup>B220<sup>-</sup>), and

18 macrophage (M $\phi$ , CD11c<sup>-</sup>Gr-1<sup>low</sup>SSC<sup>low</sup>) cell numbers assessed by flow cytometry from the

19 same mice as in A. Statistical differences between groups were analysed by Kruskal–Wallis

20 and Dunn's test. \*,  $P \leq 0.05$ .

### Supplementary Figure 3

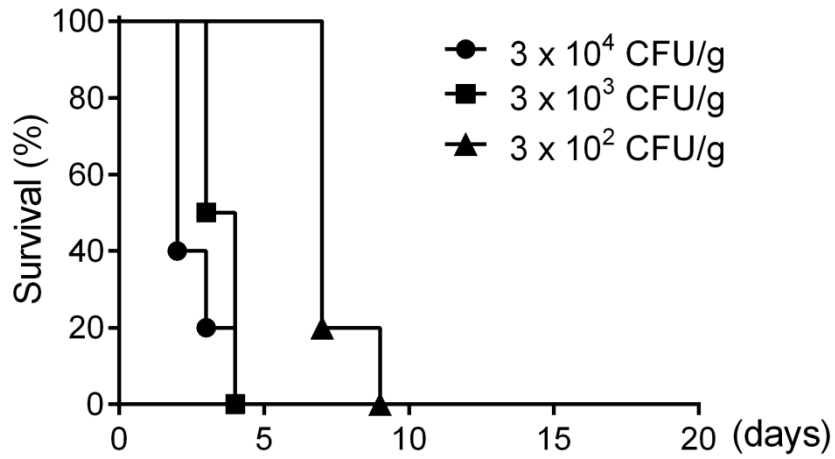

21

22

23 **Supplementary Figure 3. Lethality of different *C. albicans* inocula in immunodeficient**

24 **NSG mice.** Survival percentage over time of NSG mice infected (*i.v.*) with different *C.*

25 *albicans* inocula ( $3 \times 10^2$  CFU/g, n = 5;  $3 \times 10^3$  CFU/g, n = 4;  $3 \times 10^4$  CFU/g, n = 5).

Supplementary Fig. 4

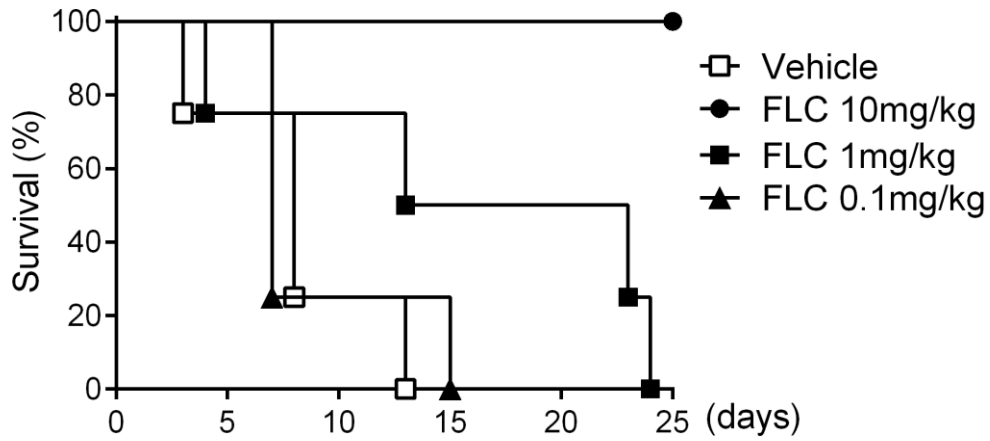

26

27

28 **Supplementary Figure 4. Dose-response effects of fluconazole in *C. albicans*-infected**

29 **mice.** Survival percentage over time of CD1 mice infected with *C. albicans* ( $3 \times 10^3$

30 CFU/g, *i.v.*) and treated daily (*i.p.*) for 1 week with vehicle ( $n = 4$ ) or different fluconazole

31 doses (FLC, 10 mg/kg,  $n = 4$ ; 1 mg/kg,  $n = 4$ ; 0.1 mg/kg,  $n = 4$ ) starting at 48 h post

32 infection.

## Supplementary Figure 5

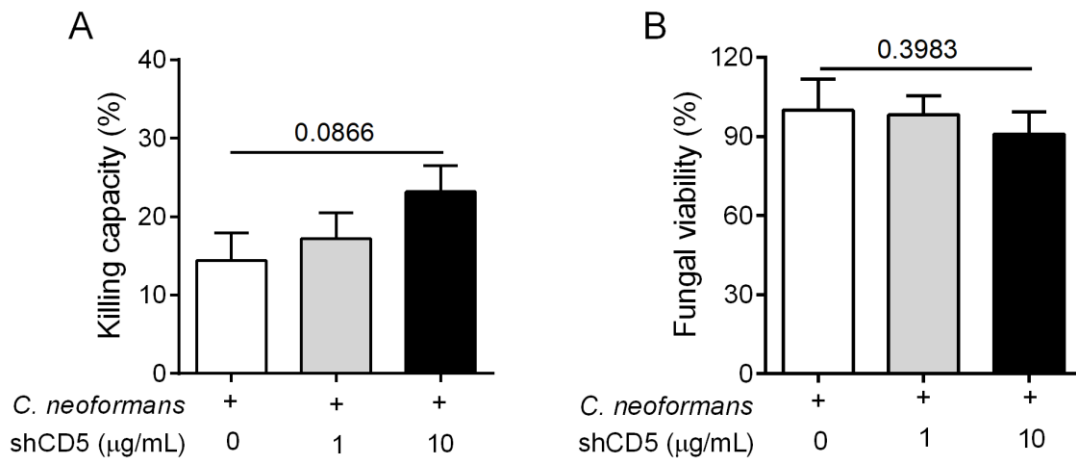

33

34 **Figure 5. Ex vivo analysis of shCD5-mediated anti-cryptococcal effects.** (A) Percentage  
35 of killed *C. neoformans* following 2 h co-cultivation of total CD1 splenocytes (10<sup>6</sup>  
36 cells/mL) with live *C. neoformans* (0.5 x 10<sup>6</sup> CFU/mL) in the presence of vehicle or shCD5  
37 (1 or 10 µg/mL). Results are the mean ± SEM from n = 10 mice. (B) Percent of viable *C.*  
38 *neoformans* following 2 h exposure of live *C. neoformans* (0.5 x 10<sup>6</sup> CFU/mL) to vehicle or  
39 shCD5 (1 or 10 mg/mL). Results are the mean ± SD of 6 replicates. Statistical differences  
40 between groups were analysed by Kruskal–Wallis and Dunn’s test. \*,  $P \leq 0.05$ .
